# Supplementary material for: Development and Validation of the Adolescent Sexual and Reproductive Competency Assessment Tool (ASRH-CAT) for Healthcare Providers
Source: MDPI journal article supplement (doi:10.3390/healthcare11081116), 2023-04-13
Supplement: s1 [file s1]

**Table S1. MANAGEMENT AND DECISION-MAKING IN ADOLESCENT SEXUAL AND REPRODUCTIVE HEALTH  
COMPETENCY ASSESSMENT TOOL (ASRH\_CAT)**

**INSTRUCTION:**

This survey asks for your knowledge, opinion, and your intention in providing services management on adolescents' health related to sexual and reproductive health concerns. It helps you to suggest the level of competency you need to manage and coordinate for ASRH at the primary health care clinics and community. Answer each question by ticking (v) the most appropriate to your understanding (only one box per question). If you are uncertain about how to answer a question, please give the best answer you can.

Scale: 0-4 (0-strongly not confident; 4-strongly confident)

| <b>Domain 1: Self-perceived ability in providing ASRH education</b><br>(think about your own perception of the ability to provide health education to adolescent clients)                  |      |                                                                                                      | Strongly<br>not | Not<br>confident | Not sure | With<br>confident | strongly<br>confident |
|--------------------------------------------------------------------------------------------------------------------------------------------------------------------------------------------|------|------------------------------------------------------------------------------------------------------|-----------------|------------------|----------|-------------------|-----------------------|
| I can provide health education to the adolescent client regarding the scope as listed:                                                                                                     |      |                                                                                                      |                 |                  |          |                   |                       |
| 1                                                                                                                                                                                          | HE1  | ASRH service access.                                                                                 |                 |                  |          |                   |                       |
| 2                                                                                                                                                                                          | HE2  | Availability of Sexually Transmitted Diseases (STI) screening test.                                  |                 |                  |          |                   |                       |
| 3                                                                                                                                                                                          | HE3  | HIV screening test service.                                                                          |                 |                  |          |                   |                       |
| 4                                                                                                                                                                                          | HE4  | Information on abortion                                                                              |                 |                  |          |                   |                       |
| 5                                                                                                                                                                                          | HE5  | Contraception methods, including emergency contraceptive measures for adolescents.                   |                 |                  |          |                   |                       |
| 6                                                                                                                                                                                          | HE6  | Guide on proper condom usage.                                                                        |                 |                  |          |                   |                       |
| 7                                                                                                                                                                                          | HE7  | STI prevention measures.                                                                             |                 |                  |          |                   |                       |
| 8                                                                                                                                                                                          | HE8  | HIV prevention measures.                                                                             |                 |                  |          |                   |                       |
| 9                                                                                                                                                                                          | HE9  | Reproductive system development in adolescents.                                                      |                 |                  |          |                   |                       |
| 10                                                                                                                                                                                         | HE10 | Adolescent services including procedures and management at the clinic                                |                 |                  |          |                   |                       |
| 11                                                                                                                                                                                         | HE11 | Information on risk sexual activities prevention and consequences                                    |                 |                  |          |                   |                       |
| 12                                                                                                                                                                                         | HE12 | Gender identity and sexual orientation (including lesbian, gay, bisexual, and transgender)           |                 |                  |          |                   |                       |
| 13                                                                                                                                                                                         | HE13 | safe sex practice                                                                                    |                 |                  |          |                   |                       |
| <b>Domain 2: Self-perceived capability in ASRH management</b><br>(Self-perceived capability in ASRH managing and decision-making skills according to guideline practice standards for PHC) |      |                                                                                                      |                 |                  |          |                   |                       |
| I am capable of to...                                                                                                                                                                      |      |                                                                                                      |                 |                  |          |                   |                       |
| 14                                                                                                                                                                                         | C1   | take SRH history from an adolescent by exploring possible undisclosed issues.                        |                 |                  |          |                   |                       |
| 15                                                                                                                                                                                         | C2   | explain the procedure involved in adolescent health services to the client                           |                 |                  |          |                   |                       |
| 16                                                                                                                                                                                         | C3   | conduct a physical examination when needed for adolescent growth and development assessment          |                 |                  |          |                   |                       |
| 17                                                                                                                                                                                         | C4   | provide a trustful consultation with rights to privacy and confidentiality                           |                 |                  |          |                   |                       |
| 18                                                                                                                                                                                         | C5   | seek consultation before any referral made                                                           |                 |                  |          |                   |                       |
| 19                                                                                                                                                                                         | C6   | adhere to local policy and guidelines of ASRH.                                                       |                 |                  |          |                   |                       |
| 20                                                                                                                                                                                         | C7   | provide pregnancy care for adolescents if needed.                                                    |                 |                  |          |                   |                       |
| 21                                                                                                                                                                                         | C8   | provide contraceptive services, including emergency contraceptive measures to adolescents if needed. |                 |                  |          |                   |                       |

|                                                                                                                                                      |     |                                                                                                                                                                                       |  |  |  |  |  |
|------------------------------------------------------------------------------------------------------------------------------------------------------|-----|---------------------------------------------------------------------------------------------------------------------------------------------------------------------------------------|--|--|--|--|--|
| 22                                                                                                                                                   | C9  | provide a treatment plan for STIs in adolescents if needed.                                                                                                                           |  |  |  |  |  |
| 23                                                                                                                                                   | C10 | I can communicate with all the stakeholders about the value of providing respectful, confidential health services to adolescents.                                                     |  |  |  |  |  |
| 24                                                                                                                                                   | C11 | provide appropriate care for a sexually abused adolescent.                                                                                                                            |  |  |  |  |  |
| <b>Domain 3: Self-perceived adequate ASRH knowledge in decision making</b><br>(self-perceived knowledge required for ASRH services/managing program) |     |                                                                                                                                                                                       |  |  |  |  |  |
| I know how to.....                                                                                                                                   |     |                                                                                                                                                                                       |  |  |  |  |  |
| 25                                                                                                                                                   | K1  | determine appropriate diagnostic tests, including for sexual assault cases.                                                                                                           |  |  |  |  |  |
| 26                                                                                                                                                   | K2  | diagnose pregnancy in adolescents, including interpreting pregnancy tests.                                                                                                            |  |  |  |  |  |
| 27                                                                                                                                                   | K3  | diagnose STI in adolescent                                                                                                                                                            |  |  |  |  |  |
| 28                                                                                                                                                   | K4  | perform appropriate timing to do clinical procedures                                                                                                                                  |  |  |  |  |  |
| 29                                                                                                                                                   | K5  | prepare the adolescent client for examination procedures                                                                                                                              |  |  |  |  |  |
| 30                                                                                                                                                   | K6  | use the standards protocols underpinning care in ASRH.                                                                                                                                |  |  |  |  |  |
| 31                                                                                                                                                   | K7  | advise usage of various contraceptive methods                                                                                                                                         |  |  |  |  |  |
| 32                                                                                                                                                   | K8  | address related factors that influence ASRH care delivery decision-making (e.g. age, gender, policies).                                                                               |  |  |  |  |  |
| 33                                                                                                                                                   | K9  | Apply the ASRH-related laws i.e. in Malaysia the Child Act (2001) and Child Act Amendment (2016)                                                                                      |  |  |  |  |  |
| 34                                                                                                                                                   | K10 | Apply the local policies for the provision of ASRH service.                                                                                                                           |  |  |  |  |  |
| 35                                                                                                                                                   | K11 | Assess for ASRH risk factors                                                                                                                                                          |  |  |  |  |  |
| <b>Domain 4: Self-perceived appropriate attitude ASRH management</b><br>(self-perceived attitudes toward ASRH clients)                               |     |                                                                                                                                                                                       |  |  |  |  |  |
| I am ...                                                                                                                                             |     |                                                                                                                                                                                       |  |  |  |  |  |
| 36                                                                                                                                                   | A1  | not judge adolescents with societal SRH problems such as pregnancy out of wedlock, HIV positive status, having STI, practicing different sexual orientations, or are gender dysphoria |  |  |  |  |  |
| 37                                                                                                                                                   | A2  | ready to provide appropriate treatment services to all adolescent clients with SRH problems regardless of their background                                                            |  |  |  |  |  |
| 38                                                                                                                                                   | A3  | able to communicate SRH issues with adolescents.                                                                                                                                      |  |  |  |  |  |
| 39                                                                                                                                                   | A4  | able to give non-judgemental counseling to an adolescent who has been sexually abused.                                                                                                |  |  |  |  |  |
| 40                                                                                                                                                   | A5  | not take the adolescent's SRH issues personally.                                                                                                                                      |  |  |  |  |  |

ASRH\_CAT has 40 items and 4 domains with a range of scores 0-100. Each domain is calculated independently. A higher score indicates a better competency level. The calculation for each domain is as follows:

Domain 1(HE1-HE13): Self-perceived ability in providing ASRH education: sum scores item in domain 1 X 100/(13x4)

Domain 2(C1-C11): Self-perceived capability in ASRH management: sum scores item in domain 2 X 100/(11x4)

Domain 3(K1-K11): Self-perceived adequate ASRH knowledge in decision making: sum scores item in domain 3 X 100/(11x4)

Domain 4 (A1-A5): Self-perceived appropriate attitude in ASRH management: sum scores item in domain 4 X 100/(5x4)

Aggregation scores for all domains are not calculated as the competency level needs to be assessed based on domains.
